# Supplementary material
Source: Springer Nature journal article supplement (https://www.springermedizin.de/resource/supplementary/13014_2012_722_MOESM6_ESM.pdf/9634046)

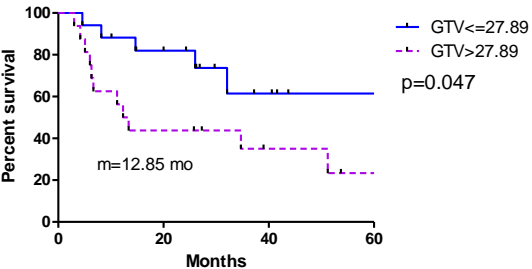

Supplement: MOESM6 [file 9634046]
